# Supplementary material
Source: MDPI journal article supplement (https://www.mdpi.com/2073-4395/10/5/696)

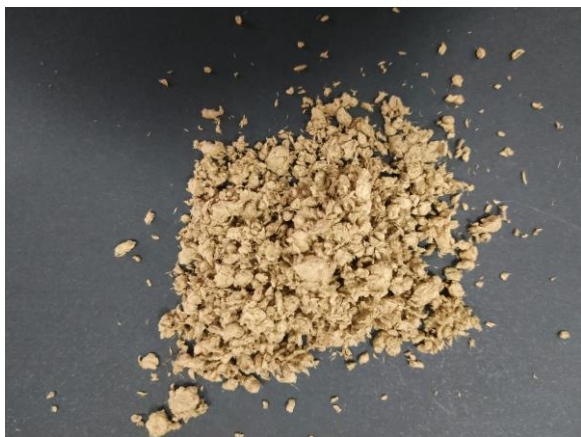

**(a)**

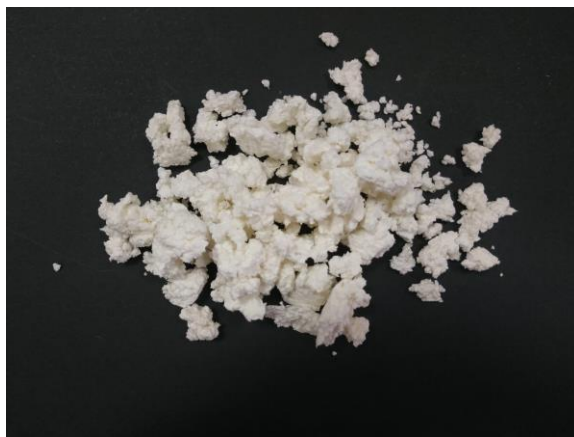

**(b)**

**Figure S1.** Cellulose pulp images. **(a)** Unbleached pulp. **(b)** Bleached pulp.

Supplement: s1 [file s1]
